# Supplementary material
Source: MDPI journal article supplement (https://www.mdpi.com/2073-4395/12/10/2371)
Supplement: s1 [file s1]

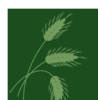

**Table S1.** Species composition, density (individuals/ha), and species incidence of planted ornamental palms in the studied permanent sampling plots where *Rhynchophorus palmarum* adults were sampled in central Veracruz, Mexico.

| Palm species\Intensity of management       | Density | Incidence |
|--------------------------------------------|---------|-----------|
| <i>Adonidia merrillii</i> (Becc.)          | 191     | 3         |
| <i>Archontophoenix alexandrae</i> (Muell.) | 155     | 1         |
| <i>Bismarckia nobilis</i> Hildebrandt      | 34      | 1         |
| <i>Caryota urens</i> L.                    | 239     | 3         |
| <i>Chamaedorea elegans</i> Mart.           | 84      | 1         |
| <i>Dypsis decaryi</i> (Jum.)               | 88      | 2         |
| <i>Dypsis lutescens</i> (Wendl.)           | 185     | 3         |
| <i>Howea forsteriana</i> Becc.             | 514     | 5         |
| <i>Hyophorbe lagenicaulis</i> (Bailey)     | 94      | 1         |
| <i>Livistona australis</i> (R.Br.) Mart.   | 25      | 1         |
| <i>Phoenix dactylifera</i> L.              | 89      | 1         |
| <i>Phoenix roebelenii</i> O'Brien          | 2460    | 14        |
| <i>Rhapis excelsa</i> (Thunb.) A.Henry     | 27      | 1         |
| <i>Roystonea regia</i> (Kunth)             | 1201    | 10        |
| <i>Syagrus romanzoffiana</i> (Cham.)       | 6038    | 13        |
| <i>Washingtonia robusta</i> Wendl.         | 603     | 8         |
| <i>Wodyetia bifurcata</i> Irvine           | 547     | 6         |

**Table S2.** Farmer semi-structured survey to identify agrochemical use frequency for controlling pests, weeds, diseases, and enrich soil fertility in ornamental palm plantations in central Veracruz, Mexico.

| No. | Question                                                                                   | Answer |
|-----|--------------------------------------------------------------------------------------------|--------|
| 1   | Ornamental palm crop name                                                                  |        |
| 2   | Date                                                                                       |        |
| 3   | Name of owner                                                                              |        |
| 4   | Position of respondent                                                                     |        |
| 5   | Number of cultivated palms?                                                                |        |
| 6   | How long has this plot been a palm crop?                                                   |        |
|     | <i>a) Pest control</i>                                                                     |        |
| 8   | What type of control does the owner use to control the populations of <i>R. palmarum</i> ? |        |
| 9   | How often does the owner utilize this control type?                                        |        |
|     | <i>B) Weed control</i>                                                                     |        |
| 11  | What type of control does the owner use to control the weeds?                              |        |
| 12  | How often does the owner utilize this control type?                                        |        |
|     | <i>D) Disease control</i>                                                                  |        |
| 17  | What type of control does the owner use for controlling the fungal disease?                |        |
| 18  | How often does the farm apply this type of control for fungal disease?                     |        |
|     | <i>C) Soil fertility</i>                                                                   |        |
| 14  | What type(s) of fertilizer does the farm apply to the palm plantation?                     |        |
| 15  | How often does the farm apply these fertilizers?                                           |        |
